# Supplementary material for: How cardiolipin modulates the dynamics of respiratory complex I
Source: PubMed Central journal article supplement — Sci Adv. 2019 Mar 20;5(3):eaav1850. doi: 10.1126/sciadv.aav1850 (PMC6426460; doi:10.1126/sciadv.aav1850), 2019-03-20
Supplement: aav1850_SM.pdf [file aav1850_SM.pdf]

## Supplementary Materials for

### How cardiolipin modulates the dynamics of respiratory complex I

Alexander Jussupow, Andrea Di Luca, Ville R. I. Kaila\*

\*Corresponding author. Email: [ville.kaila@ch.tum.de](mailto:ville.kaila@ch.tum.de)

Published 20 March 2019, *Sci. Adv.* **5**, eaav1850 (2019)

DOI: [10.1126/sciadv.aav1850](https://doi.org/10.1126/sciadv.aav1850)

#### The PDF file includes:

Fig. S1. Comparison of cardiolipin molecules bound to Nqo8 from coarse-grained and atomistic models.

Fig. S2. The structure of the membrane domain of complex I from *T. thermophilus*.

Fig. S3. Electrostatic potential surface of the bacterial and mammalian complex I.

Fig. S4. Global motion of complex I with and without cardiolipin.

Fig. S5. Projection of complex I dynamics with and without cardiolipin along the bending (PC1) and twisting (PC2) modes.

Table S1. Overview of all coarse-grained MD simulations.

Table S2. Residues within 3 Å of putative channels 1 and 2.

Legends for movies S1 and S2

#### Other Supplementary Material for this manuscript includes the following:

(available at [advances.sciencemag.org/cgi/content/full/5/3/eaav1850/DC1](https://advances.sciencemag.org/cgi/content/full/5/3/eaav1850/DC1))

Movie S1 (.mov format). Cardiolipin binding to complex I from a coarse-grained simulation trajectory.

Movie S2 (.mov format). Cardiolipin-induced channel formation dynamics.

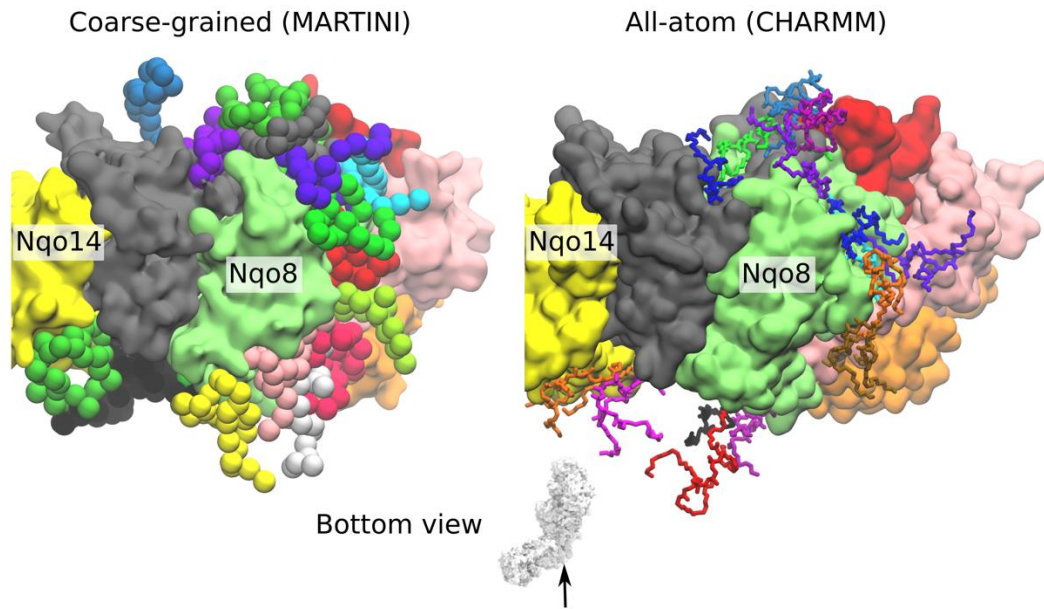

**Fig. S1. Comparison of cardiolipin molecules bound to Nqo8 from coarse-grained and atomistic models.** Bottom view of the membrane domain of complex I (*inset*). Comparison of cardiolipin molecules (highlighted in different colors for visual clarity) bound to Nqo8, obtained from coarse-grained (MARTINI force field, left) and all-atomistic (CHARMM36 force field, right) models.

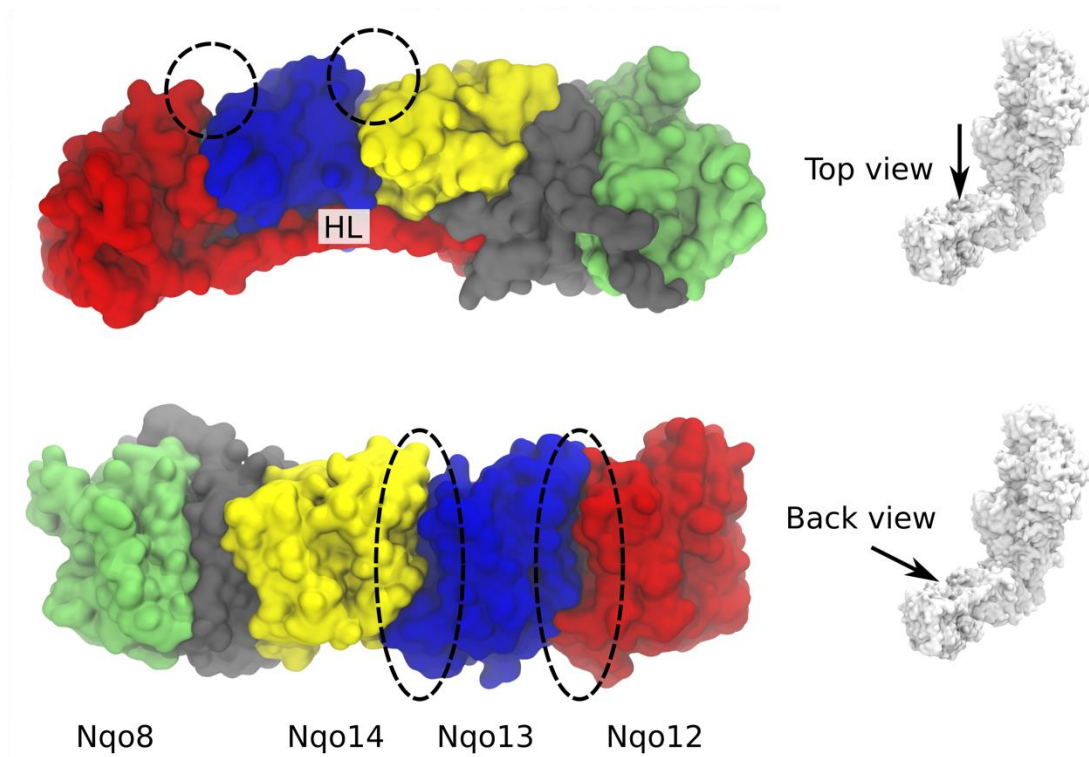

**Fig. S2.** The structure of the membrane domain of complex I from *T. thermophilus* (PDB ID:4HEA) with predicted cardiolipin binding sites between subunits Nqo12/Nqo13 and Nqo13/Nqo14 marked with dashed circles. The perspective of complex I is shown in the inset on the right.

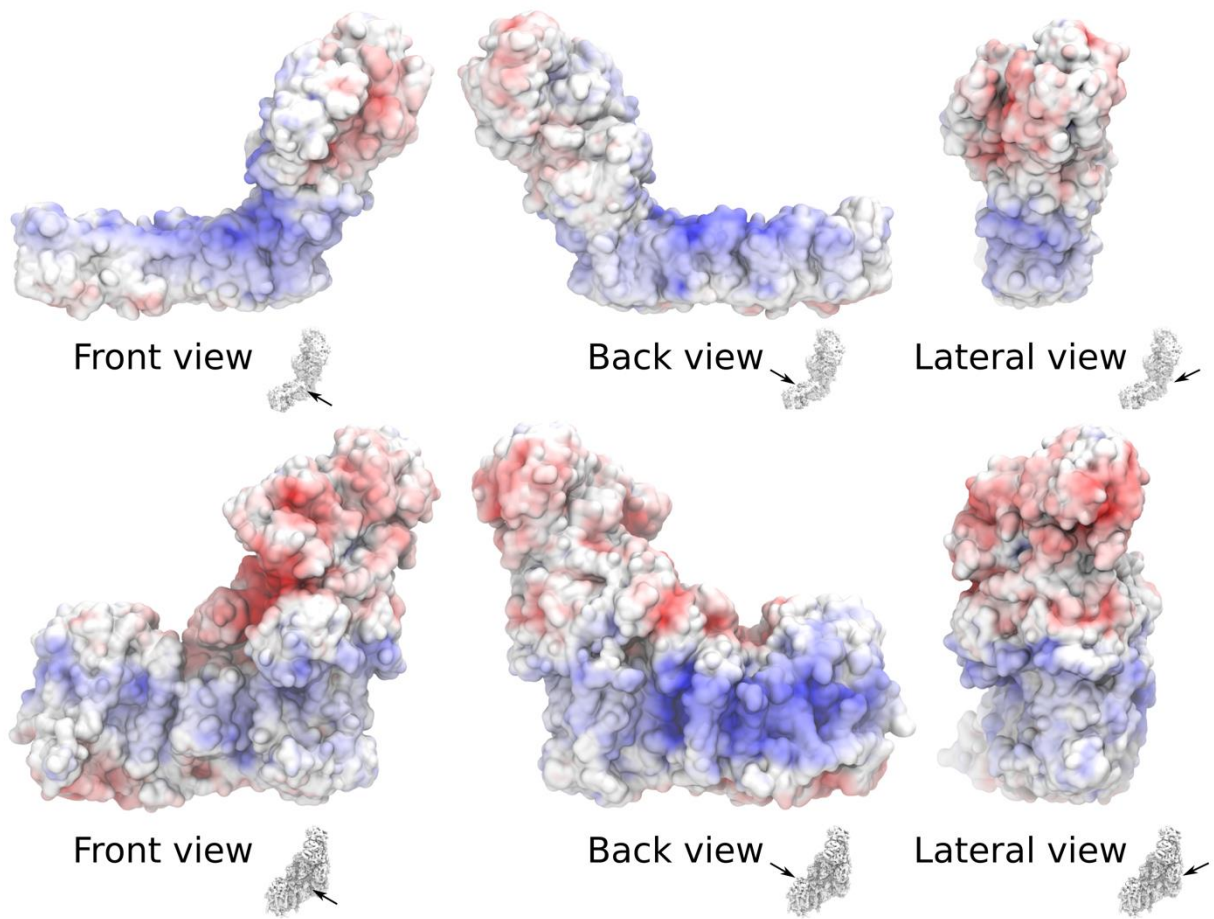

**Fig. S3. Electrostatic potential surface of the bacterial and mammalian complex I.** The color scale ranges from  $+10k_{\text{B}}T/e$  (blue, *ca.* +260 mV) to  $-10k_{\text{B}}T/e$  (red, *ca.* -260 mV) at  $T=298$  K. The sites with a positive electrostatic potential correlate well with the cardiolipin binding sites shown in fig. S2. The mammalian and bacterial complex I have a similar potential surface around the membrane domain.

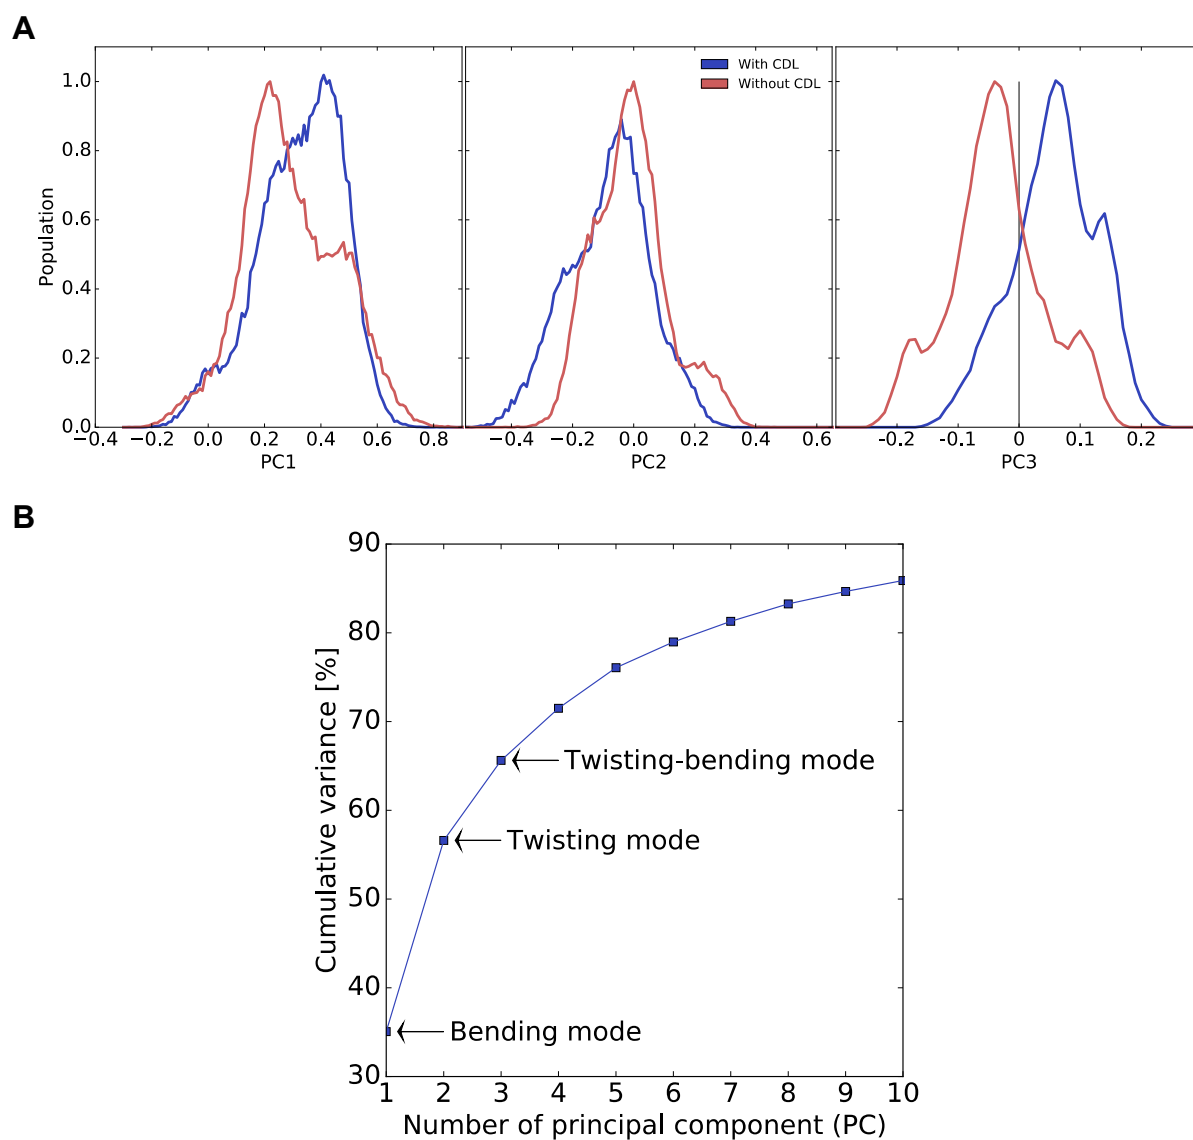

**Fig. S4. Global motion of complex I with and without cardiolipin.** **A)** Sampling the conformational space of all simulations along the bending (PC1), twisting (PC2), and coupled twisting-bending motion (PC3). Simulations with cardiolipin are shown in blue, and without cardiolipin in red. **B)** Cumulative variance of the principal component analysis. The first three principal components capture 65% of the total variance and account for around 2/3 of the total dynamics of complex I.

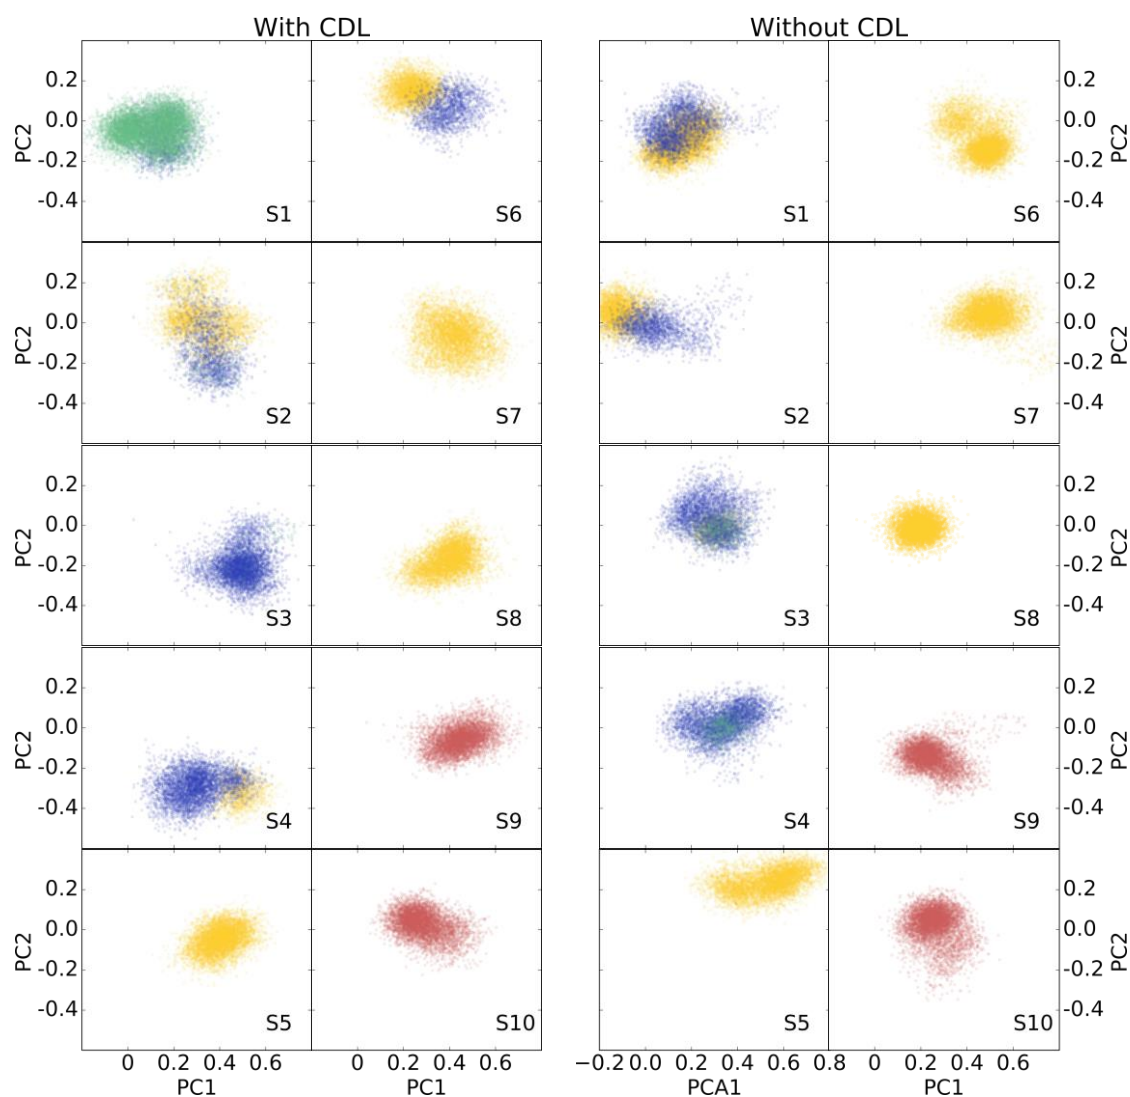

**Fig. S5. Projection of complex I dynamics with and without cardiolipin along the bending (PC1) and twisting (PC2) modes for each individual coarse-grained simulation (see table S1).**

The color scale is the same as the one shown in Fig. 4 (main text) indicating the quinone position:

no Q (in red); Q in the lower site (in yellow) and Q in upper sites (in blue and green).

**Table S1. Overview of all coarse-grained MD simulations.** The table shows the simulation time and starting quinone position in all coarse-grained simulations.

| <b>Simulation</b>          | <b>Quinone starting position</b> | <b>Simulation time [ <math>\mu</math>s ]</b> |
|----------------------------|----------------------------------|----------------------------------------------|
| <i>With cardiolipin</i>    |                                  |                                              |
| S1                         | middle                           | 101.27                                       |
| S2                         | middle                           | 54.46                                        |
| S3                         | middle                           | 52.13                                        |
| S4                         | middle                           | 50.26                                        |
| S5                         | lower                            | 52.87                                        |
| S6                         | lower                            | 54.88                                        |
| S7                         | lower                            | 53.56                                        |
| S8                         | lower                            | 53.68                                        |
| S9                         | No Q                             | 56.28                                        |
| S10                        | No Q                             | 52.03                                        |
| <b>Total:</b>              |                                  | 581.42                                       |
| <i>Without cardiolipin</i> |                                  |                                              |
| S1                         | middle                           | 101.19                                       |
| S2                         | middle                           | 54.38                                        |
| S3                         | middle                           | 54.44                                        |
| S4                         | middle                           | 51.15                                        |
| S5                         | lower                            | 57.29                                        |
| S6                         | lower                            | 57.88                                        |
| S7                         | lower                            | 56.10                                        |
| S8                         | lower                            | 60.45                                        |
| S9                         | No Q                             | 51.23                                        |
| S10                        | No Q                             | 56.49                                        |
| <b>Total:</b>              |                                  | 599.60                                       |

**Table S2. Residues within 3 Å of putative channels 1 and 2** (*cf.* Fig. 4) that are identified in the channel analysis during >25% of the simulation trajectory ("Occupancy"). Residues that are within the Q-tunnel are excluded.

| Subunit                      | Residue                  | Amino acid                                                        | Occupancy [%] |
|------------------------------|--------------------------|-------------------------------------------------------------------|---------------|
| <i>Channel 1</i>             |                          |                                                                   |               |
| Nqo6                         | 95                       | Val                                                               | 99.8          |
| Nqo6                         | 91                       | Val                                                               | 97.4          |
| Nqo6                         | 94                       | Arg                                                               | 95.9          |
| Nqo7                         | 45                       | Glu                                                               | 90.2          |
| Nqo6                         | 98                       | Gln                                                               | 84.7          |
| Nqo4                         | 31                       | Gly                                                               | 62.3          |
| Nqo7                         | 43                       | Pro                                                               | 62.1          |
| Nqo7                         | 46                       | Ser                                                               | 50.1          |
| Nqo7                         | 42                       | Met                                                               | 36.0          |
| Nqo4                         | 42                       | Arg                                                               | 33.4          |
| Nqo4                         | 29                       | Asn                                                               | 31.2          |
| Nqo6                         | 92                       | Met                                                               | 25.5          |
| <i>Channel 2</i>             |                          |                                                                   |               |
| Nqo4                         | 151                      | Arg                                                               | 99.1          |
| Nqo4                         | 148                      | Tyr                                                               | 88.0          |
| Nqo9                         | 21                       | Pro                                                               | 87.4          |
| Nqo9                         | 22                       | Val                                                               | 86.0          |
| Nqo9                         | 23                       | Thr                                                               | 65.6          |
| Nqo4                         | 149                      | Ala                                                               | 50.6          |
| Nqo6                         | 56                       | Ala                                                               | 42.9          |
| Nqo9                         | 25                       | Pro                                                               | 31.9          |
| Nqo6                         | 57                       | Arg                                                               | 27.4          |
| Partially conserved residues | Fully conserved residues | Exposed residues in the deactive state of the mammalian complex I |               |



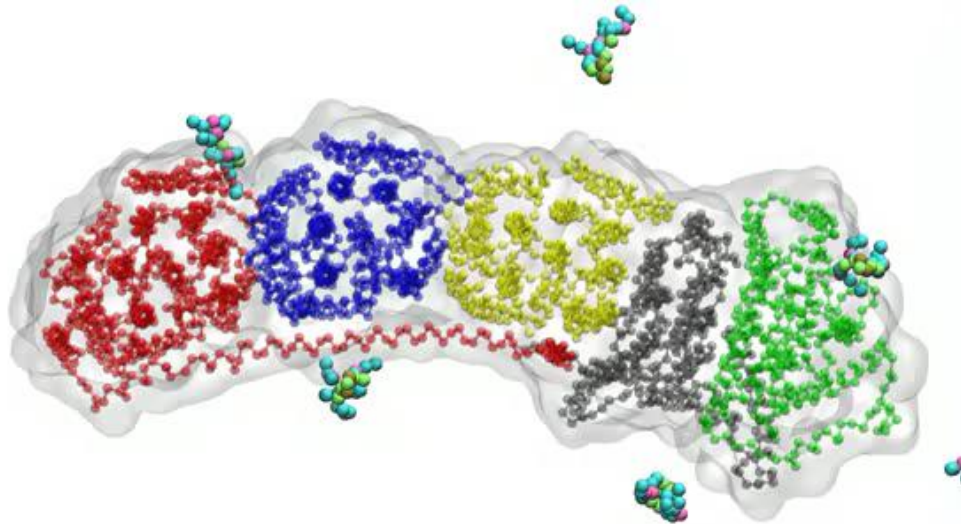

**Movie S1. Cardiolipin binding to complex I from a coarse-grained simulation trajectory**

(simulation S1, table S1). Cardiolipin is shown in CPK representation and Nqo12 (in red), Nqo13 (in blue), Nqo14 (in yellow), Nqo9/10/11 (in gray), Nqo8 (in green). POPC and POPE lipids are not shown for clarity.

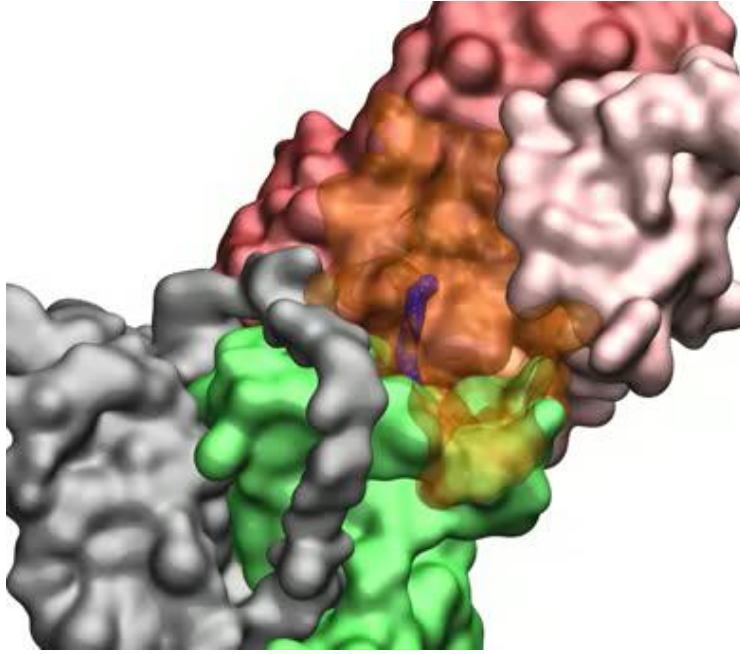

**Movie S2. Cardiolipin-induced channel formation dynamics.** Channel 1 (in red) and channel 2 (in green) connecting the N-side with the Q tunnel are strongly enhanced by cardiolipin (see Fig. 4 of the main text).
